# Supplementary material for: Nitrogen-doped porous carbon nanosheets as a robust catalyst for tunable CO2 electroreduction to syngas
Source: Royal Society of Chemistry journal article supplement (doi:10.1039/d1se02034j), 2022-01-01
Supplement: d1se02034j1.pdf [file d1se02034j1.pdf]

## Electronic Supplementary Information (ESI)

### **Nitrogen-doped porous carbon nanosheets as a robust catalyst for tunable CO<sub>2</sub> electroreduction to syngas**

Jiaojiao Gui,<sup>a</sup> Kaifu Zhang,<sup>\*a</sup> Xiaowen Zhan,<sup>b</sup> Yu Yu,<sup>a</sup> Tao Huang,<sup>a</sup> Yunkai Li,<sup>a</sup> Jingyu Xue,<sup>a</sup> Xin Jin,<sup>a</sup> Shan Gao<sup>\*a</sup> and Yi Xie<sup>c</sup>

<sup>a</sup>College of Chemistry and Chemical Engineering, Anhui University, Hefei, Anhui 230601 P. R. China.

<sup>b</sup>School of Materials Science and Engineering, Anhui University, Hefei, Anhui 230601 P. R. China.

<sup>c</sup>Hefei National Laboratory for Physical Sciences at Microscale, University of Science & Technology of China, Hefei, Anhui 230026 P. R. China.

\*Corresponding authors.

E-mail: [shangao@ahu.edu.cn](mailto:shangao@ahu.edu.cn), [kfzhang@ahu.edu.cn](mailto:kfzhang@ahu.edu.cn)

## 1. Experimental

### 1.1 CO<sub>2</sub> Reduction Procedure

The reduction process was performed using a conventional three-electrode electrochemical H-type cell, with a piece of Nafion®117 membrane as a separator. An Ag/AgCl and a Pt foil (1×1 cm) were used as the reference and the counter electrodes, respectively. A 30 mL 1.0 M KHCO<sub>3</sub> solution was used as the electrolyte, which was bubbled with 1.0 atm CO<sub>2</sub> (99.999%) to reach saturation with CO<sub>2</sub>.

All potentials initially measured in this work were converted to the reversible hydrogen electrode (RHE) using the following Nernst equation:

$$E(\text{RHE}) = E(\text{Ag/AgCl}) + 0.199 + 0.059 \times \text{pH}$$

The Faradaic efficiency of CO was calculated from the total amount of charge (Q/C) passed through the sample and the total amount of CO (nCO/mol).  $Q=I \times t$ , where I is the reduction current at a specific applied potential, and t is the time for the constant reduction current. The total amount of CO produced was measured using gas chromatography (GC, Agilent 8860). As two electrons are needed to produce one CO molecule, the Faradaic efficiency can be calculated as follows: Faradaic efficiency =  $2F \times n\text{CO} / (I \times t)$ , where F is the Faraday constant (96,485 C/mol).

### 1.2 Electrochemically Active Surface Area (ECSA) Measurement

The ECSA was estimated by measuring the capacitive current associated

with double-layer charging from the scan rate dependence of cyclic voltammetry (CV). The measurement was performed among a potential window of -0.041 to 0.158 V vs. RHE, where the Faradaic current on working electrode is negligible.

### **1.3 *In-situ* FTIR.**

The preparation of working electrodes for operando IR measurements were modified from a previously reported method. Briefly, an Au thin film is plated on the reflective surface of the Si prism, and then drop-coated with the catalyst ink. The catalyst ink was prepared by mixing 5 mg samples with 30  $\mu$ L Nafion (5%) in 0.5 mL deionized water. The ink dispersion was then uniformly drop-coated onto the above prepared Au film. The working electrode was mounted in a one-compartment, three-electrode spectroelectrochemical cell with a platinum-wire as the counter electrode and a standard Ag/AgCl electrode as the reference. A bare Au film without catalyst loading was served as the background control. The FTIR spectra were captured using a Nicolet iS50 FT-IR spectrometer equipped with a MCT detector. The spectral resolution was set to 4  $\text{cm}^{-1}$  for all measurements. All electrochemical tests were controlled using a CHI electrochemical workstation (CHI760E) with 1.0 M  $\text{KHCO}_3$  used as the electrolyte. Before the measurements, Ar gas was bubbled into the electrolyte for at least 20 min to remove the residual air, followed by a

continuous CO<sub>2</sub> purge for at least 30 min until the electrolyte is CO<sub>2</sub>-saturation. In a typical test, with CO<sub>2</sub> continuously bubbled into the electrolyte, the activation of the working electrode was first carried out by cycling the potential between 0 and -1.0 V vs. RHE until a repeatable CV was obtained. Then, the potential was swept between -0.3 and -0.7 V vs. RHE at 5 mV s<sup>-1</sup> for electrochemical measurements.

## 2. Addition Data

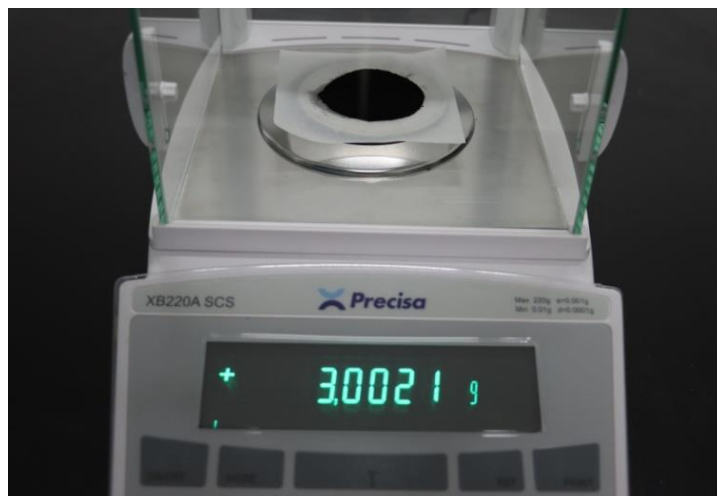

**Fig. S1** The digital image for the sample of NCN-6.

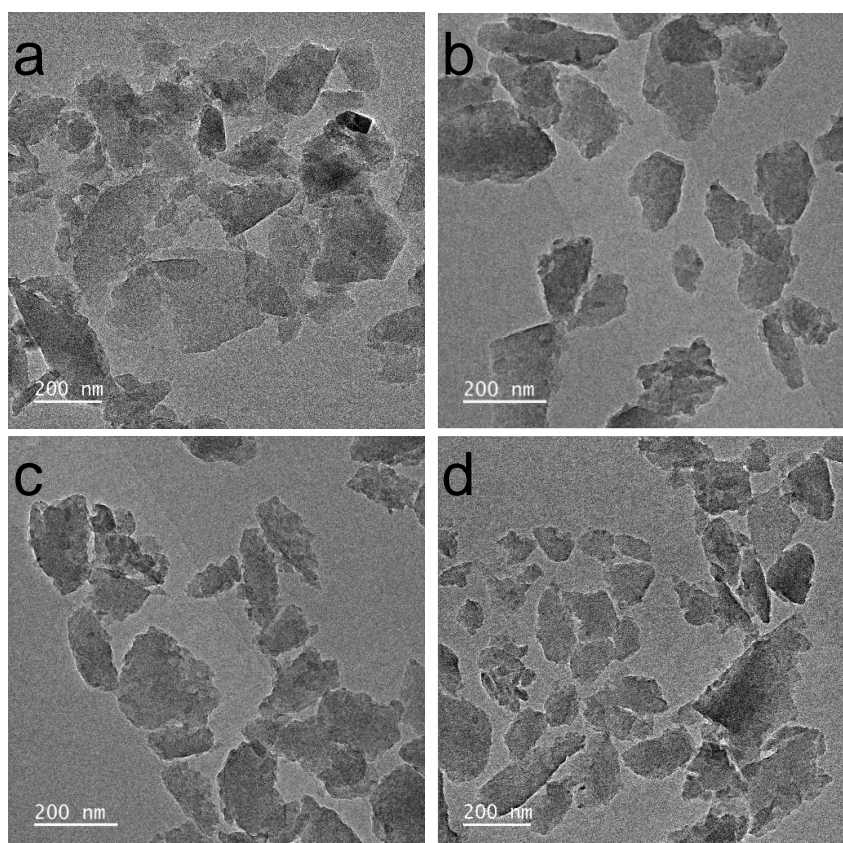

**Fig. S2** TEM images of samples: (a) NCN. (b) NCN-3. (c) NCN-4.5. (d) NCN-9.

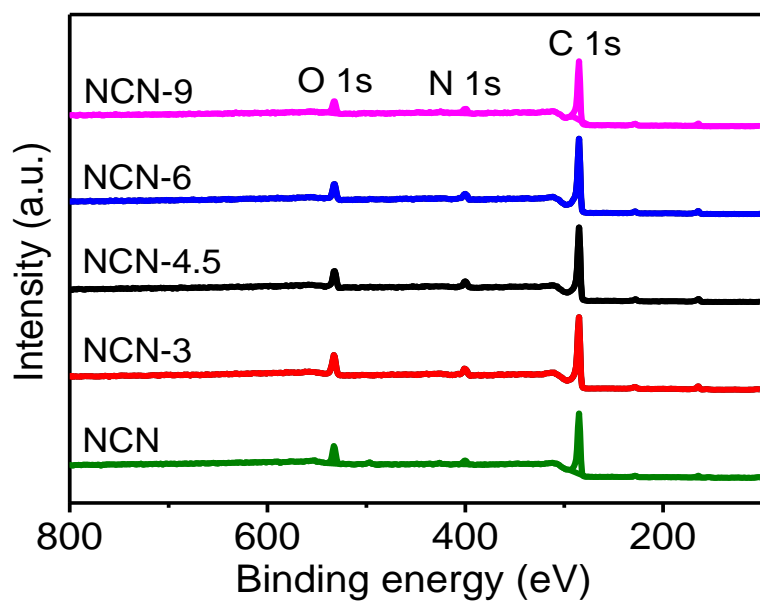

**Fig. S3** The XPS survey of all prepared NCN materials.

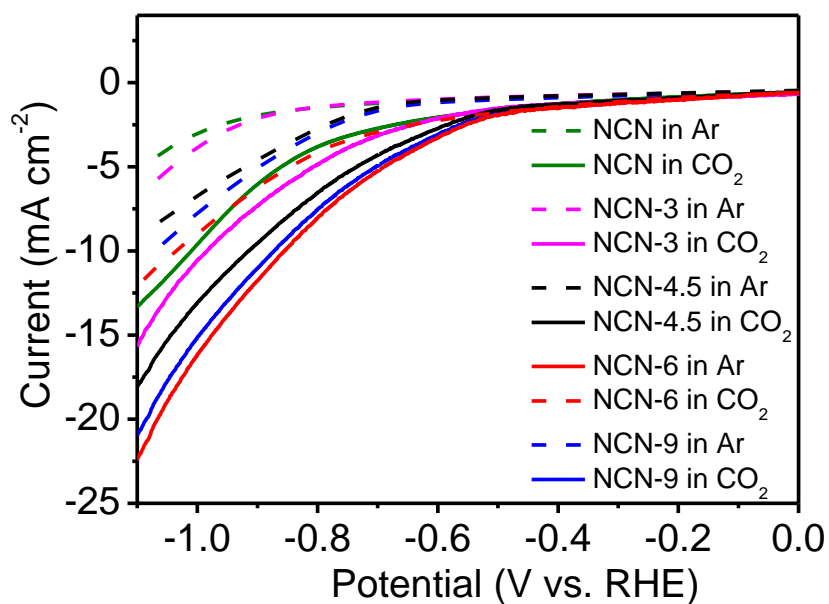

**Fig. S4** LSV curves of all as-prepared NCN materials in CO<sub>2</sub>-saturated (solid line) and Ar-saturated (dashed line) 1 M KHCO<sub>3</sub> solution.

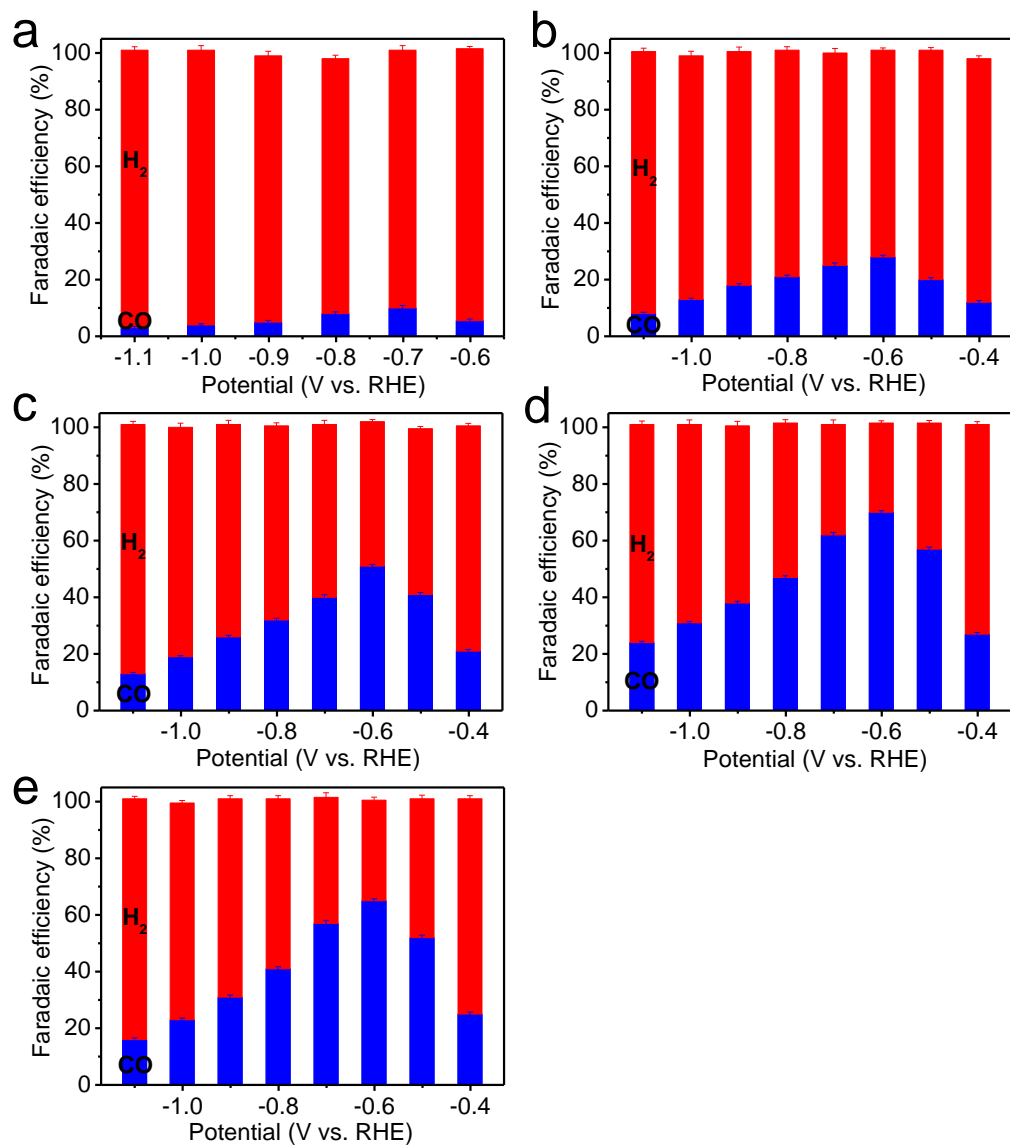

**Fig. S5** FE of  $CO_2$  and  $H_2$  distribution depending on applied potential:(a) NCN. (b) NCN-3. (c) NCN-4.5. (d) NCN-6. (e) NCN-9.

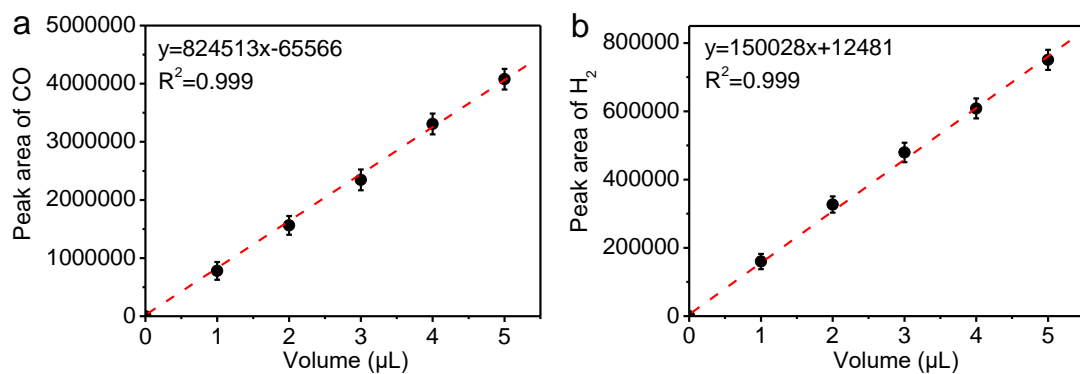

**Fig. S6** The relevant standard curve for the detection of (a) CO and (b) H<sub>2</sub> products.

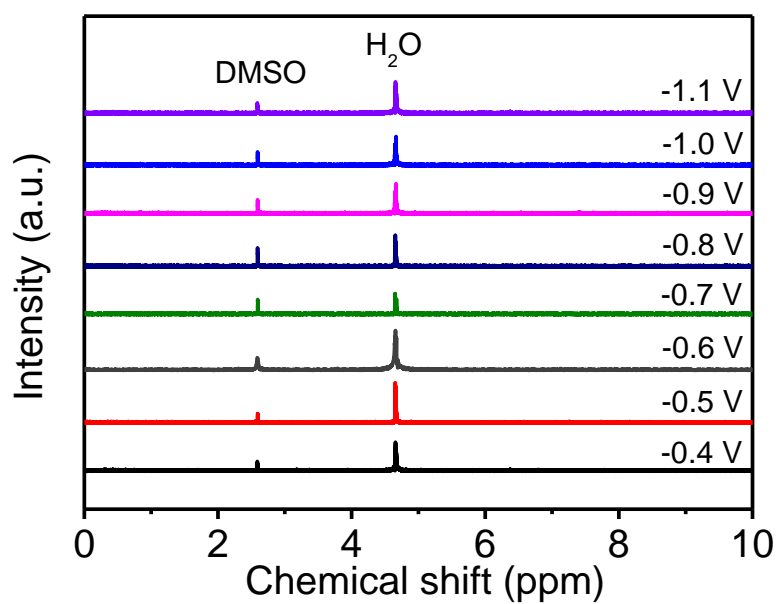

**Fig. S7** NMR of liquid products of NCN-6 at each potential from -0.4 V to -1.1 V vs. RHE.



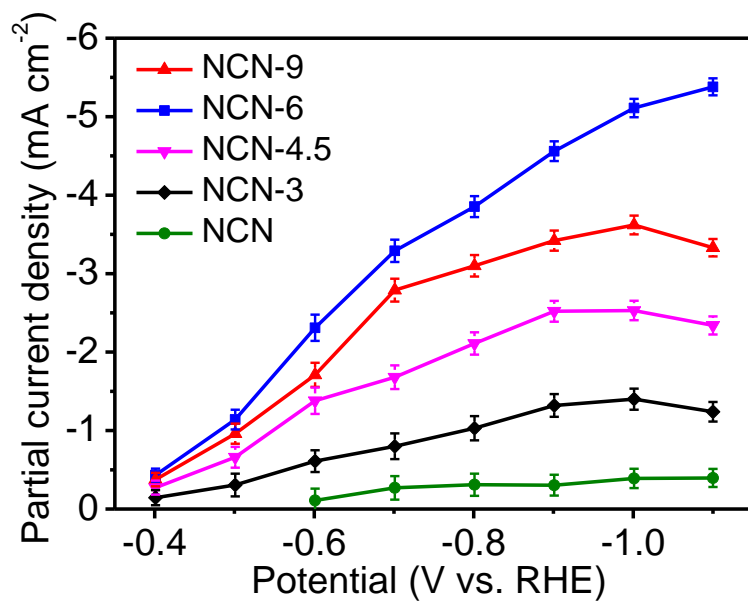

**Fig. S8** Partial current density of CO generated on various NCN materials.

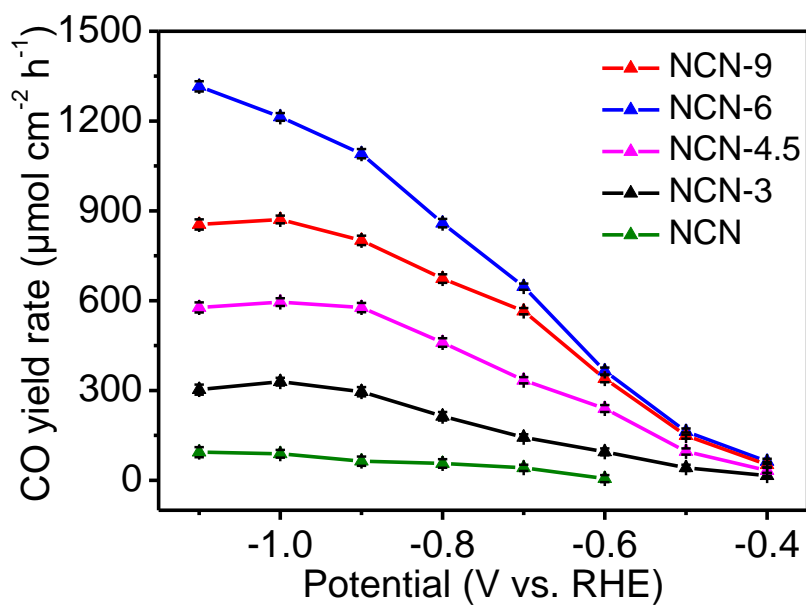

**Fig. S9** CO production rate over various NCN catalysts at the given potentials.

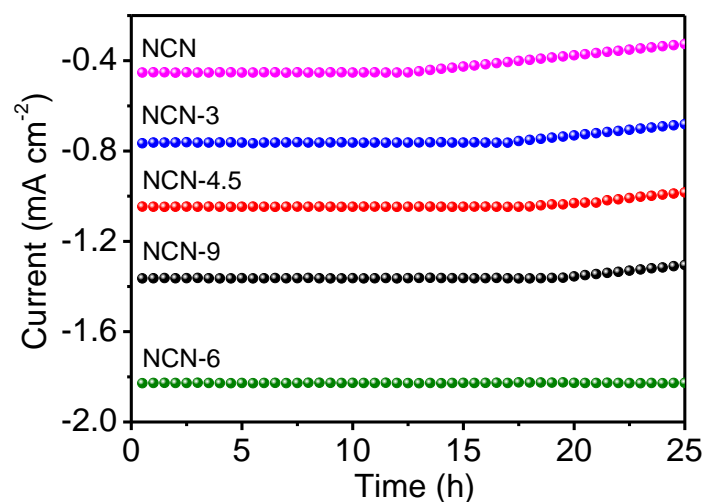

**Fig. S10** Long-term stability of all as-prepared catalysts in 1.0 M KHCO<sub>3</sub> at the -0.6V vs. RHE.

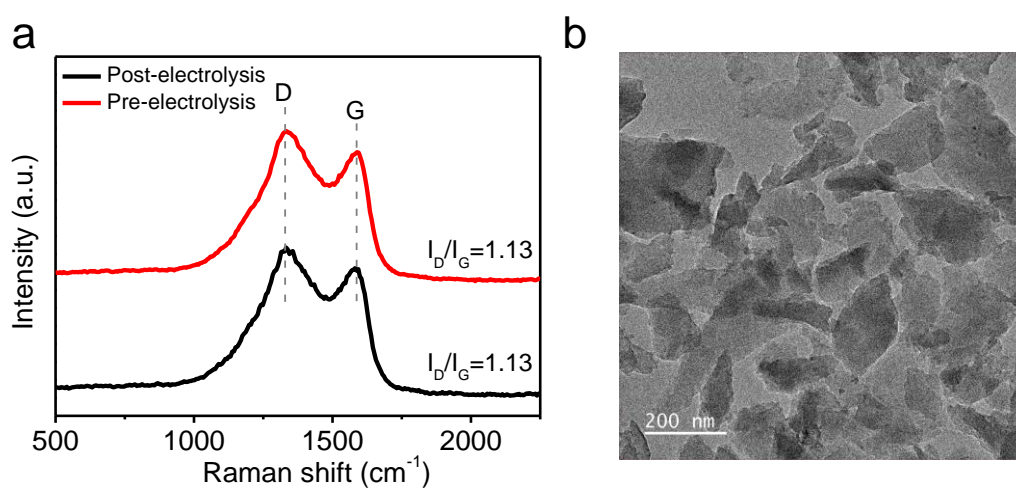

**Fig. S11** (a) Raman spectra and (b) TEM image of NCN-6 after CO<sub>2</sub>RR at -0.6 V vs. RHE over 25 h.

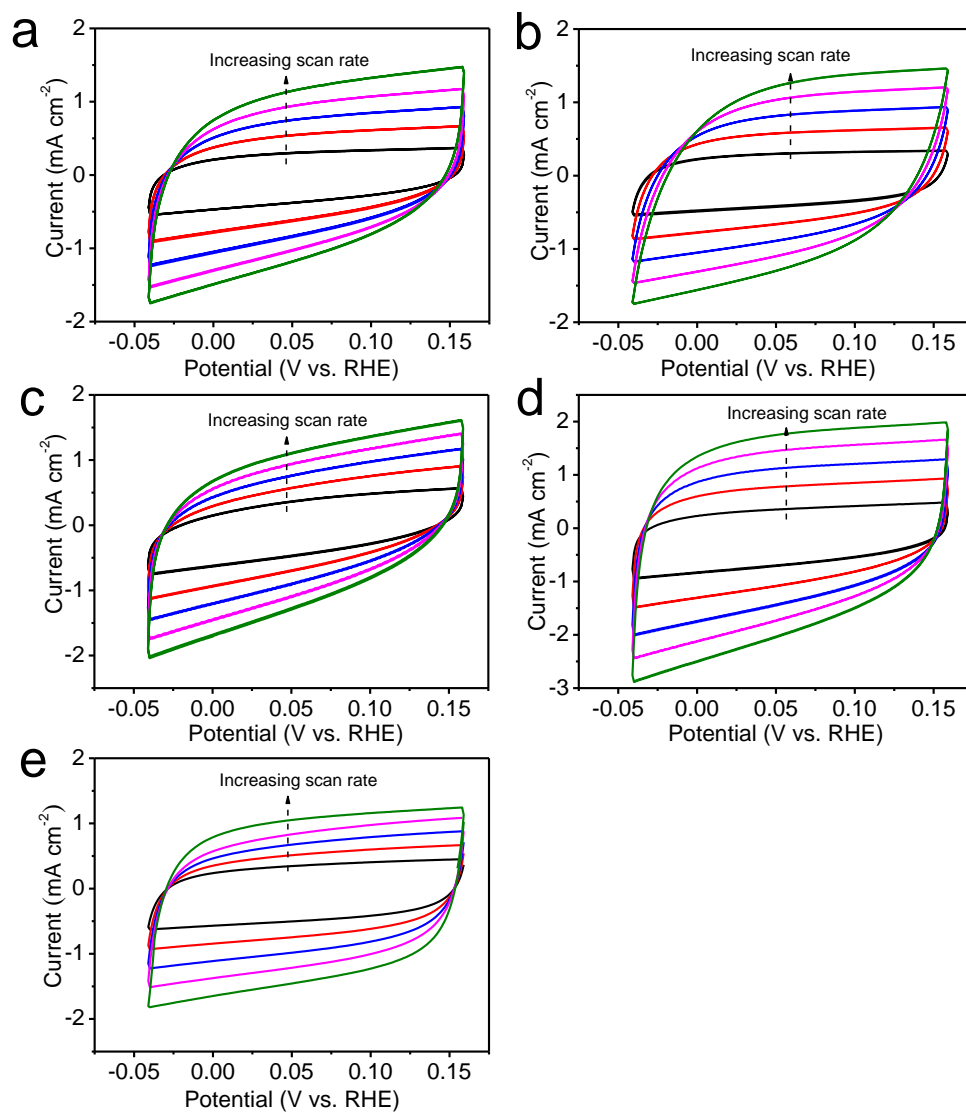

**Fig. S12** Current density plots against potentials under a series scan rates of (a) NCN. (b) NCN-3. (c) NCN-4.5. (d) NCN-6. (e) NCN-9. Electrolyte: 1 M KHCO<sub>3</sub>. The scan rate: 10, 20, 30, 40 and 50 mV s<sup>-1</sup>.

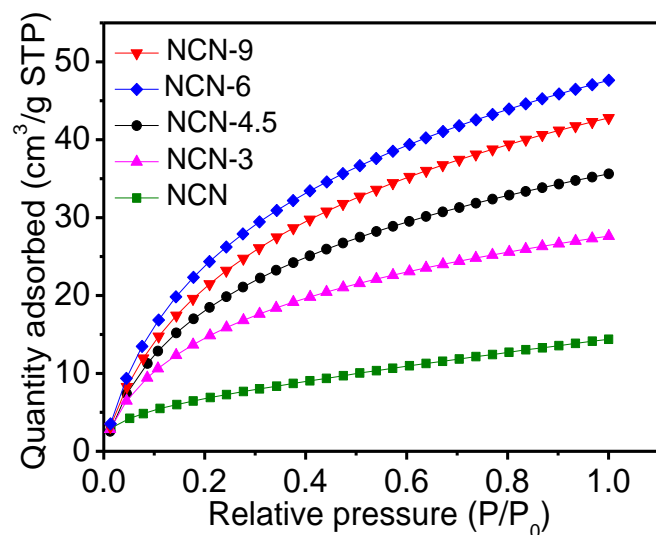

**Fig. S13** CO<sub>2</sub> adsorption isotherms of various NCN catalysts.

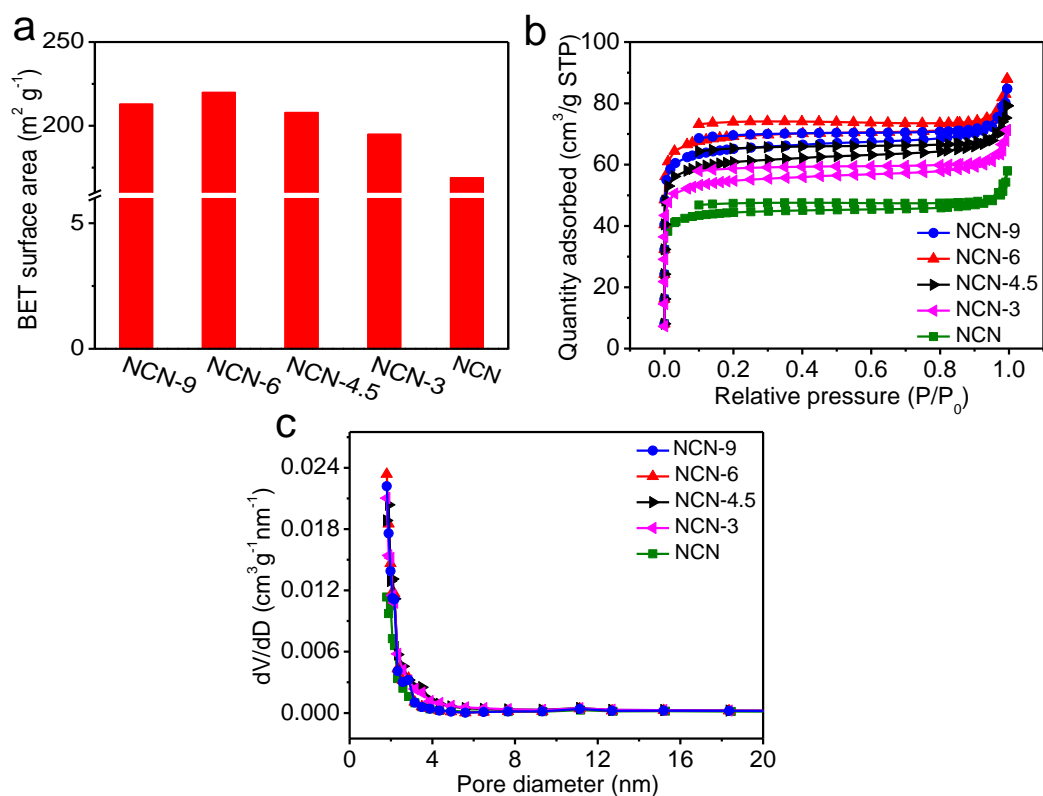

**Fig. S14** (a) The BET surface areas, (b) the adsorption-desorption and (c) pore size distribution isotherms of NCN, NCN-3, NCN-4.5, NCN-6 and NCN-9.

**Table S1.** The content of N and C in different catalysts by elemental analysis.

| Catalysts | The content C/Atom% | The content N/Atom% |
|-----------|---------------------|---------------------|
| NCN       | 95.8                | 4.1                 |
| NCN-3     | 94.3                | 5.7                 |
| NCN-4.5   | 93.2                | 6.8                 |
| NCN-6     | 92.3                | 7.7                 |
| NCN-9     | 92.6                | 7.4                 |

**Table S2.** The content of N species in different catalysts by XPS.

| Catalysts | Pyridinic N<br>/Atom% | Pyrrolic N<br>/Atom% | Graphitic N<br>/Atom% | Oxidized N<br>/Atom% |
|-----------|-----------------------|----------------------|-----------------------|----------------------|
| NCN       | 0.44                  | 0.55                 | 2.12                  | 0.57                 |
| NCN-3     | 0.88                  | 0.61                 | 2.28                  | 1.27                 |
| NCN-4.5   | 1.37                  | 0.68                 | 2.81                  | 1.08                 |
| NCN-6     | 1.74                  | 0.75                 | 2.82                  | 1.28                 |
| NCN-9     | 1.67                  | 0.77                 | 2.77                  | 1.14                 |

**Table S3.** Electrocatalytic CO<sub>2</sub> RR performance of recently reported metal-free catalysts.

| <b>Catalysts</b>          | <b>Electrolyte</b>     | <b>FE<sub>CO</sub></b> | <b>Current density</b><br><b>(mA cm<sup>-2</sup>)</b> | <b>Ref.</b> |
|---------------------------|------------------------|------------------------|-------------------------------------------------------|-------------|
| NCN-6                     | 1.0M KHCO <sub>3</sub> | 70%                    | -22                                                   | This work   |
| NSHCF900                  | 0.1M KHCO <sub>3</sub> | 94%                    | -103                                                  | 1           |
| OA-PCN                    | 0.5MNaHCO <sub>3</sub> | 40%                    | -7                                                    | 2           |
| MPC-1000                  | 0.1M KHCO <sub>3</sub> | 62%                    | -6                                                    | 3           |
| NPC-1000                  | 0.5M KHCO <sub>3</sub> | 98.4%                  | -14                                                   | 4           |
| Se-CN <sub>s</sub>        | 0.1M KHCO <sub>3</sub> | 90%                    | -20                                                   | 5           |
| NS-CNS <sub>s</sub> -1000 | 0.5M KHCO <sub>3</sub> | 85.4%                  | -18                                                   | 6           |
| NS-C-900                  | 0.1M KHCO <sub>3</sub> | 92%                    | -14                                                   | 7           |
| NC-1100                   | 0.5M KHCO <sub>3</sub> | 95%                    | -12                                                   | 8           |
| NCNT                      | 0.1M KHCO <sub>3</sub> | 80%                    | -1.0                                                  | 9           |
| NC-900-HH                 | 0.1M KHCO <sub>3</sub> | 90%                    | -5                                                    | 10          |

## References

- 1 H. Yang, Y. Wu, Q. Lin, L. Fan, X. Chai, Q. Zhang, J. Liu, C. He and Z. Lin, Composition tailoring via N and S co-doping and structure tuning by constructing hierarchical pores: Metal-free catalysts for high-performance electrochemical reduction of CO<sub>2</sub>, *Angew. Chem. Int. Ed.*, 2018, **57**, 15476-15480.
- 2 N. Meng, W. Zhou, Y. Yu, Y. Liu and B. Zhang, Superficial hydroxyl and amino groups synergistically active polymeric carbon nitride for CO<sub>2</sub> electro-reduction, *ACS Catal.*, 2019, **9**, 10983-10989.
- 3 F. Pan, A. Liang, Y. Duan, Q. Liu, J. Zhang and Y. Li, Self-growth-templating synthesis of 3D N, P, Co-doped mesoporous carbon frameworks for efficient bifunctional oxygen and carbon dioxide electroreduction, *J. Mater. Chem. A*, 2017, **5**, 13104-13111.
- 4 D. Xue, H. Xia, W. Yan, J. Zhang and S. Mu, Defect engineering on carbon-based catalysts for electrocatalytic CO<sub>2</sub> reduction, *Joule*, 2018, **2**, 2551-2582.
- 5 B. Zhang, J. Zhang, F. Zhang, L. Zheng, G. Mo, B. Han and G. Yang, Selenium-doped hierarchically porous carbon nanosheets as an efficient metal-free electrocatalyst for CO<sub>2</sub> reduction, *Adv. Funct. Mater.*, 2020, **30**, 1906194.
- 6 G. Wang, M. Liu, J. Jia, H. Xu, B. Zhao, K. Lai, C. Tu and Z. Wen, Nitrogen and sulfur co-doped carbon nanosheets for electrochemical

- reduction of CO<sub>2</sub>, *ChemCatChem*, 2020, **1**, 2203-2208.
- 7 F. Pan, B. Li, W. Deng, Z. Du, Y. Gang, G. Wang and Y. Li, Promoting electrocatalytic CO<sub>2</sub> reduction on nitrogen-doped carbon with sulfur addition, *Appl. Catal. B-Environ.*, 2019, **252**, 240-249.
  - 8 Z. Zhang, L. Yu, Y. Tu, R. Chen, L. Wu, J. Zhu and D. Deng, Unveiling the active site of metal-free nitrogen-doped carbon for electrocatalytic carbon dioxide reduction, *Cell Rep. Phys. Sci.*, 2020, **1**, 100145.
  - 9 J. Wu, R. Yadav, M. Liu, P. Sharma, C. Tiwary, L. Ma, X. Zou, X. Zhou, B. Yakobson, J. Lou and P. Ajayan, Achieving highly efficient, selective, and stable CO<sub>2</sub> reduction on nitrogen-doped carbon nanotubes, *ACS Nano*, 2015, **9**, 5364-5371.
  - 10 P. Yao, Y. Qiu, T. Zhang, P. Su, X. Li and H. Zhang, N-doped nanoporous carbon from biomass as a highly efficient electrocatalyst for the CO<sub>2</sub> reduction reaction, *ACS Sustain. Chem. Eng.*, 2019, **7**, 5249-5255.
